# Supplementary material
Source: Springer Nature journal article supplement (http://www.springermedizin.de/resource/supplementary/12955_2005_228_MOESM1_ESM.pdf/9559946)
Supplement: MOESM1 [file 9559946]

## Physical Component Score (PCS) of the SF-36

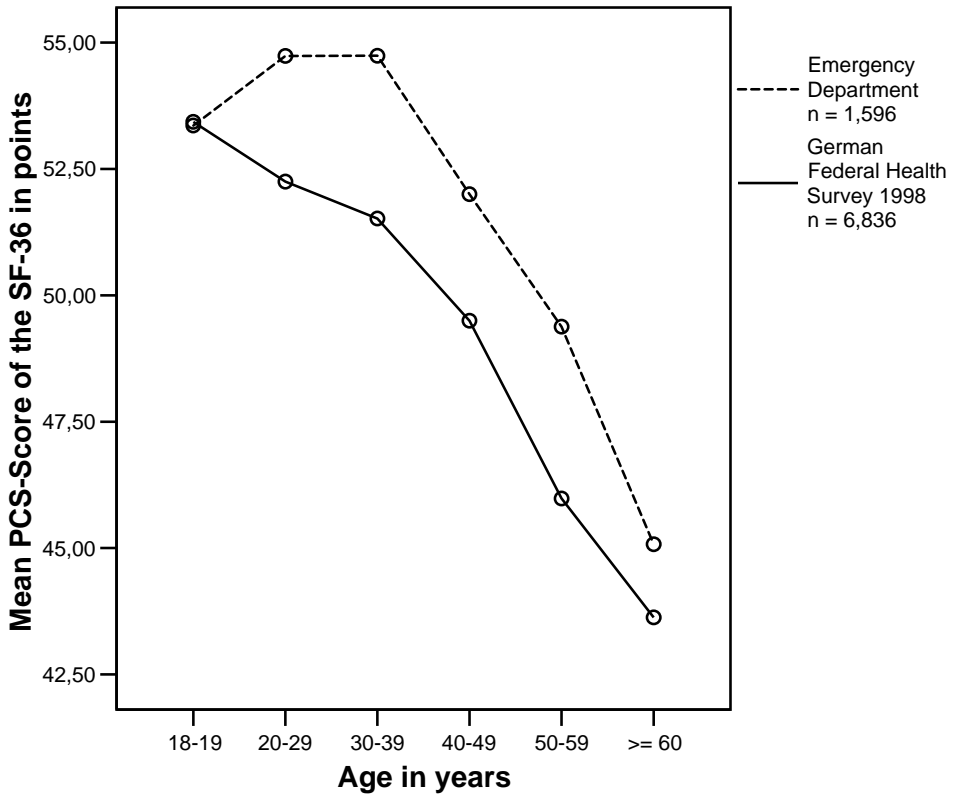

Results of multifactor analysis of variance (ANOVA); Levene-Test:  $p < 0.001$ .

| Parameter                    | F-value | p       |
|------------------------------|---------|---------|
| Gender                       | 19.54   | < 0.001 |
| Age-group                    | 96.66   | < 0.001 |
| Setting                      | 40.85   | < 0.001 |
| Gender * age-group           | 1.91    | 0.090   |
| Gender * setting             | 0.78    | 0.378   |
| Age-group * setting          | 1.66    | 0.140   |
| Gender * age-group * setting | 1.06    | 0.384   |
